# Supplementary material
Source: publisher figshare collection journal article supplement (https://acs.figshare.com/ndownloader/files/10495747)
Supplement: Supplementary file 1 [file 10495747]

## Sheet: Table S1
PDB entries used for fragment library
1a1g	1j75	102d
1a1h	1kfs	109d
1a1k	1krp	110d
1a31	1lau	115d
1a73	1omh	122d
1a74	1pfe	123d
1aay	1po6	133d
1ais	1qsl	151d
1az0	1rnb	152d
1azp	1u1k	159d
1azq	1u1n	161d
1b3t	1vtg	168d
1b94	1xjv	182d
1b95	1xvk	183d
1bpy	1xvn	188d
1brn	2d7d	190d
1bss	2fdf	191d
1bsu	2fdh	192d
1ca6	2fvr	196d
1cyq	2i5s	197d
1dfm	2oxv	198d
1dsz	2p2r	1ana
1e3m	2qfj	1bd1
1e3o	2up1	1bna
1egw	2z70	1cgc
1eon	3hts	1cn0
1eoo	3i2o	1cvy
1eyu	3i3m	1d12
1fiu	3i49	1d15
1g2d	3kjp	1d16
1g2f	3kqn	1d17
1g9y	3n1i	1d21
1gd2	3q0b	1d23
1gu4	3u7f	1d35
1gu5	3u7h	1d36
1i3w	3vok	1d38
1ig7	3zdd	1d39
1ipp	4hid	1d43
1j1v	4him	1d44
1je8	4hio	1d45
1jk2	4hj5	1d46
1jnm	4hj9	1d56
1jx4	4hqu	1d60
1k3w	4i28	1d61
1k4t	4i29	1d63
1k61	4i2b	1d64
1kbu	4ibv	1d65
1kx3	4ibw	1d67
1kx5	4kmf	1d8g
1l3l	4lz1	1d90
1l3s	4noe	1d91
1l3t	4ou6	1da0
1l3u	4qm7	1dj6
1lat	4rec	1dl8
1lli	4xzf	1dnt
1llm	4zhn	1dnx
1lmb	5bua	1dpl
1lv5	5haw	1dpn
1m07	5hk3	1eg6
1m3h	5hre	1em0
1m5r	5hrt	1en3
1mnn	5hru	1en8
1mus	5iff	1en9
1n39	5td5	1ene
1n3a	5tkz	1enn
1n3f		1evp
1n4l		1fd5
1nh2		1fdg
1njz		1fhy
1nk7		1fms
1nkb		1fn2
1nkc		1g75
1nke		1g8n
1orp		1g8u
1owg		1g8v
1ph6		1hq7
1pji		1i0f
1pjj		1i0k
1pue		1i0o
1q3f		1i0t
1qbj		1i2y
1qn3		1i47
1qn6		1i5w
1qn9		1ick
1qna		1ih4
1qne		1ikk
1qrv		1ilc
1qum		1ims
1r2z		1j8l
1r71		1jgr
1rff		1jo2
1rg1		1jpq
1rg2		1jux
1rgt		1k9g
1rh6		1kci
1rva		1kgk
1rvc		1l4j
1rxw		1l6b
1sa3		1ljx
1skm		1m6g
1ssp		1m77
1stx		1ma8
1suz		1mf5
1sx8		1msw
1sxq		1nab
1tdz		1nqs
1tsr		1nzg
1tup		1o56
1u47		1ofx
1u48		1omk
1u49		1p4y
1ua1		1pjg
1unm		1prp
1vto		1pwf
1w0t		1qyk
1w0u		1qyl
1wb9		1r41
1wte		1r68
1wtv		1rqy
1wtx		1s2r
1x9m		1s45
1xo0		1sgs
1xsn		1ub8
1xsp		1uhx
1xvr		1uhy
1yo5		1v3n
1ytb		1vaq
1ztt		1vj4
1zzi		1vro
2ac0		1vt8
2ahi		1vtb
2asd		1vth
2ata		1vtt
2b0d		1vtu
2bcq		1vtv
2bcr		1vtw
2bcu		1vty
2bcv		1wqy
2bdp		1xa2
2c7o		1xam
2c7q		1xcs
2c7r		1xcu
2cgp		1xjy
2d5v		1y84
2ddg		1y86
2dp6		1z5t
2e1c		1z7i
2e43		1zbl
2e52		1zf0
2euz		1zf1
2evf		1zf3
2evh		1zf4
2evi		1zf5
2evj		1zf6
2fld		1zf7
2fmp		1zf8
2fms		1zf9
2fr4		1zfb
2g1p		1zfc
2gij		1zff
2hax		1zfm
2heo		1zje
2hhq		1zph
2hht		1zpi
2hhu		200d
2hhv		208d
2hhw		213d
2hr1		216d
2hvi		223d
2hw3		224d
2i06		227d
2ibt		232d
2ih2		234d
2ih4		238d
2imw		239d
2irf		242d
2nob		243d
2noh		244d
2np7		245d
2o49		246d
2oa8		258d
2ofi		263d
2og0		265d
2oyt		266d
2p0j		270d
2pfn		271d
2pfp		272d
2pqu		275d
2pxi		277d
2pyl		279d
2r1j		293d
2r2r		295d
2uvv		298d
2uvw		2b1b
2vbj		2b2b
2vbo		2b3e
2ve9		2d34
2vih		2d47
2vjv		2dcg
2voa		2dlj
2vs7		2dp7
2w35		2dpc
2w36		2dqp
2w7n		2dqq
2xcs		2elg
2xhi		2et0
2xo6		2fij
2xzf		2fil
2y1j		2g8f
2z3x		2g8k
2zkd		2g8v
2zo0		2g8w
2zo1		2gpx
3a46		2gw0
3aaf		2gwa
3bam		2gwq
3bdp		2hc7
3bep		2hri
3bi3		2i2i
3bie		2nsk
3bkz		2orh
3c46		2pl8
3c58		2qef
3cmy		2r7y
3cvu		2rf3
3cvv		302d
3dpg		305d
3dvo		306d
3e40		311d
3exl		314d
3eyi		315d
3eyz		317d
3ez5		318d
3f21		320d
3f8j		324d
3fsi		331d
3g6p		334d
3g6t		336d
3g6v		337d
3g6x		338d
3g6y		346d
3g8x		352d
3g99		355d
3g9m		360d
3g9o		365d
3g9p		366d
3ga6		368d
3gfi		369d
3go3		370d
3go8		381d
3gp1		382d
3gpp		384d
3gpy		385d
3gv5		388d
3gv8		390d
3hp6		394d
3ht3		395d
3hwt		396d
3i0w		398d
3i0x		3cco
3iag		3cdm
3iay		3co3
3igm		3dnb
3isb		3e9w
3isc		3eru
3jpn		3ey2
3jpo		3f8o
3jps		3fl6
3jpt		3fqb
3jtg		3ft6
3k0s		3ggi
3k58		3gjl
3k59		3gnk
3k5m		3gsj
3khc		3gsk
3khl		3hr3
3l8b		3i5e
3lwm		3iff
3m7k		3igt
3m8s		3iki
3m9o		3k18
3mda		3kjo
3mdc		3kq8
3mfh		3ltr
3mfi		3n4n
3mr3		3nz7
3mr6		3o3f
3nci		3omj
3ndh		3ot0
3ndk		3oz3
3ngi		3oz4
3nh1		3pbx
3o1m		3q61
3o1p		3qf8
3o1r		3qrn
3o1s		3sd8
3o1v		3t5e
3ohb		3t86
3oju		3tvb
3or3		3u08
3osf		3u2n
3osg		3u38
3oym		3u89
3pmn		3ukb
3pv8		3ukc
3pvv		3uke
3q23		3uld
3q8k		3uq0
3q8s		3zp8
3qei		403d
3qer		408d
3qev		411d
3qew		412d
3qex		414d
3qmb		417d
3qmc		427d
3qmd		431d
3qmi		432d
3qws		440d
3qx3		441d
3qz7		443d
3qz8		448d
3rax		449d
3rh6		452d
3rjh		453d
3rjj		454d
3rkq		455d
3rtv		456d
3rzg		461d
3s57		467d
3s8q		473d
3si8		476d
3sjm		485d
3spl		4agz
3spy		4ah0
3sq0		4ah1
3sq1		4d9y
3sq2		4dqs
3ssc		4dy8
3sv3		4e2r
3sv4		4e60
3syz		4e7y
3t3f		4e8s
3tan		4e8x
3taq		4e95
3tar		4f2x
3ted		4f2y
3tfr		4f3u
3tfs		4f4n
3thv		4f8i
3ti0		4fs5
3u6c		4gju
3u6d		4glc
3u6o		4gre
3u6p		4h5a
3u6y		4hif
3ugo		4itd
3uk3		4izq
3ulp		4khu
3uta		4kw0
3v6t		4kwx
3v9z		4l25
3vag		4l26
3vaj		4ltf
3vd6		4ltg
3vk8		4m3i
3vke		4mkw
3wvk		4ndf
3zda		4o5x
3zh2		4o5z
3zvm		4ocb
4b21		4okl
4b9l		4puq
4b9n		4qc7
4b9u		4qcl
4bwj		4qio
4bxo		4qno
4c8l		4r15
4c8m		4r45
4cn2		4r4d
4cn5		4re7
4crx		4rhd
4df8		4rip
4dfj		4rnk
4dfk		4ro8
4dfm		4rok
4dfp		4u5m
4dl3		4u8a
4dl7		4u8b
4doa		4u92
4dob		4x1a
4doc		4xsn
4dqp		4ys5
4dqq		4z4b
4dqr		5awh
4ds5		5axe
4dse		5axf
4dsf		5b2p
4dsi		5b2q
4dtj		5b2r
4dtm		5b2s
4dtp		5bxw
4dts		5bz7
4dtu		5bz9
4du1		5cdb
4du3		5dsb
4dwi		5e36
4e3s		5ebi
4e9f		5erz
4ea4		5es0
4ea5		5et9
4ebe		5ewb
4ecq		5ezf
4ecr		5fhj
4ecs		5ihd
4ecu		5jvw
4ecv		5us2
4ecx		5usg
4ecy		5wsp
4ed0		5wsq
4ed1		7bna
4elv		8bna
4esj		9bna
4ez6
4ez9
4f2r
4f4k
4f5n
4f5o
4f5p
4ff3
4ff4
4fj7
4fjg
4fjh
4fji
4fjj
4fjl
4fjm
4fjn
4fjx
4fk0
4fk2
4fk4
4flw
4g4n
4g4q
4g92
4gck
4gjp
4gjr
4gxi
4gxj
4gzn
4h0e
4hcb
4hje
4hly
4hn5
4hp3
4hue
4i2o
4j2b
4j2e
4j9l
4jcy
4jrp
4k4h
4k96
4k99
4kb0
4klf
4klh
4kli
4klt
4klu
4lg0
4ljr
4lmg
4lnq
4lvi
4lvj
4lvl
4lvs
4m0a
4m3w
4m3y
4m41
4m45
4m8o
4m94
4m95
4m9e
4m9g
4m9j
4m9v
4mhg
4ndh
4nm6
4o0i
4o3n
4o3o
4o3p
4ofa
4oln
4osr
4p2h
4phe
4q0w
4q8e
4qeo
4qju
4qr9
4qwb
4qwd
4r2q
4r55
4r64
4r65
4rkh
4rnn
4roe
4rpx
4rpy
4rq0
4rq4
4rq8
4rtj
4rtk
4tu8
4tup
4tur
4u0y
4uaw
4uay
4ub3
4ub4
4ubb
4wcg
4wls
4x9j
4xeg
4xo0
4xpc
4xpe
4xrm
4ycx
4yhx
4yov
4yox
4yp3
4yr2
4yr3
4z47
4z5d
4z7z
4z8f
5a0w
5a3d
5av6
5bol
5bom
5bpc
5c5j
5ciy
5cl3
5cl6
5cl7
5cla
5cld
5d9i
5d9y
5dba
5deu
5dff
5dfh
5dfj
5dg0
5dg8
5dg9
5dgb
5dlf
5dqh
5dwa
5e67
5e69
5e6a
5eea
5ewe
5ewf
5ewg
5exh
5f8a
5ff8
5fhd
5g34
5hnf
5hr9
5hrb
5iii
5iik
5iil
5iim
5iin
5inp
5inq
5j0o
5j0p
5j0q
5j0r
5j0s
5j0u
5j0y
5j29
5j2j
5jlw
5jre
5jxy
5ke6
5kfa
5kfb
5kfd
5kfg
5kfj
5kfn
5kfr
5kfs
5kfu
5kfx
5kg0
5kg1
5kg2
5kg3
5kg4
5kl2
5kl3
5kn9
5krb
5l0m
5l1k
5l1l
5l9x
5tb8
5trd

## Sheet: Table S3
			Test set A	Test set B ssDNA-protein	Test set B multiple chain DNA-protein	Test set B A-type DNA	Test set B Z-type DNA	Test set B quadruplex	Test set C
			1a1f	1i7d	1a1f	137d	131d	1jrn	1ca5
			1a1i	1mw8	1a1i	138d	145d	1kf1	1gtw
			1a1j	1u1l	1a1j	160d	181d	1l1h	1i3j
			1b97	1u1m	1a3q	189d	1d24	1o0k	1jk1
			1bc7	1u1o	1awc	1d13	1d48	1v3o	1tv9
			1bc8	1u1p	1b97	1d26	1d76	2avh	1wtq
			1bnz	1u1q	1bc7	1d78	1da2	2gwe	2axy
			1ca5	1u1r	1bc8	1d79	1dcg	2hbn	2dgc
			1cdw	2c62	1bf4	1dns	1dnf	2o4f	2e42
			1ckq	2es2	1bgb	1dnz	1m6r	3eqw	2fjv
			1cz0	2i0q	1bhm	1f6e	1woe	3es0	2r2t
			1d02	3dsd	1bnz	1y7f	1zna	3eui	3cbb
			1du0	3ngo	1bua	1y8l	292d	3eum	3fc3
			1dux	3u7g	1by4	1y8v	2f8w	3nyp	3g8u
			1f0v	4a15	1c8c	1y9f	2hto	3qxr	3jxb
			1gtw	4dih	1ca5	1y9s	2ie1	3uyh	3m8r
			1h6f	4dii	1cdw	1yb9	2obz	4fxm	3mva
			1i3j	4fpv	1cz0	1ybc	312d	4g0f	3v9x
			1i6j	4hik	1d02	1zex	313d	4p1d	4fpv
			1i7d	4hj7	1d2i	1zey	362d	4r47	4klm
			1jb7	4hj8	1dc1	1zfa	3p4j	4wo2	4m3u
			1jgg	4hja	1du0	212d	3wbo	5ccw	4mde
			1jk1	4i2a	1dux	220d	400d		4mdf
			1mjm	4i2f	1ebm	221d	4dwy		5e6c
			1mjo	4usg	1emh	240d	4e4o		5ink
			1n6j	5dlo	1emj	254d	4fs6
			1oj8	5fb2	1eo3	256d	4hig
			1p47	5h8w	1eo4	260d	4xqz
			1p71	5hp4	1esg	2d95	5jzq
			1qn5	5luw	1ewn	2h05
			1rvb		1ewq	339d
			1s32		1f0v	340d
			1t9i		1f44	341d
			1t9j		1fjl	342d
			1tv9		1fyl	345d
			1wd0		1fym	371d
			1wd1		1g38	401d
			1wto		1g9z	5fhl
			1wtq		1gtw	9dna
			1wtr		1h6f
			1wtw		1i3j
			1xi1		1i6j
			1zaa		1i8m
			1zs4		1jb7
			1ztw		1jgg
			2a07		1jk1
			2agq		1jxl
			2axy		1k3x
			2bop		1k82
			2dgc		1l1t
			2e42		1l1z
			2ex5		1l2c
			2fjv		1l2d
			2fjw		1l3v
			2fjx		1l5u
			2h7g		1lww
			2han		1lwy
			2nq9		1m3q
			2o4a		1mey
			2oaa		1mjm
			2r2t		1mjo
			2rdj		1n48
			2vy1		1n6j
			2wiw		1njw
			2xqc		1njx
			3bm3		1njy
			3c0w		1nk0
			3c2p		1nk4
			3cbb		1nk5
			3d0p		1nk6
			3d2w		1nk8
			3dsd		1nk9
			3fc3		1nkp
			3fdq		1nlw
			3fyl		1nnj
			3g6u		1nvp
			3g8u		1oe4
			3gox		1orn
			3hdd		1owf
			3jpq		1p47
			3jxb		1p71
			3jxc		1pm5
			3jxd		1puf
			3khr		1qn4
			3kmd		1qn5
			3kxt		1qn8
			3l2c		1qzg
			3ldy		1rfi
			3lwh		1rv5
			3m8r		1rvb
			3mva		1rys
			3ngz		1rzt
			3ogu		1s0o
			3ojs		1s10
			3oqg		1s32
			3po4		1s9f
			3pvi		1sfu
			3py8		1sl1
			3q22		1sx5
			3q24		1t7p
			3qet		1t9i
			3rh4		1t9j
			3s9h		1tez
			3si6		1tk5
			3sm4		1tro
			3snn		1tv9
			3spd		1u45
			3ut9		1u4b
			3v1z		1u8b
			3v9s		1ua0
			3v9w		1uut
			3v9x		1wd0
			3va0		1wd1
			4a75		1wto
			4a76		1wtp
			4aij		1wtq
			4aik		1wtr
			4aqx		1wtw
			4b9s		1xc8
			4dav		1xc9
			4dlg		1xi1
			4dqi		1xyi
			4elt		1y8z
			4elu		1zaa
			4f1h		1zjm
			4f4w		1zrf
			4f4x		1zs4
			4ff2		1ztw
			4fj5		2a07
			4fj8		2a66
			4fj9		2adw
			4fjk		2agq
			4fpv		2aoq
			4gz0		2aor
			4hc9		2axy
			4is1		2b0e
			4j2a		2bam
			4j2d		2bcs
			4jwm		2bq3
			4k1g		2br0
			4kb1		2c7p
			4klg		2dem
			4klj		2dnj
			4kll		2e42
			4klm		2ea0
			4lb6		2etw
			4lup		2euv
			4m3r		2euw
			4m3t		2eux
			4m3u		2evg
			4m3x		2ex5
			4m3z		2f5n
			4m42		2f5o
			4mde		2f5p
			4mdf		2fjv
			4o6a		2fjw
			4ofe		2fjx
			4qwa		2fmq
			4qwe		2fqz
			4s0n		2gb7
			4uno		2gig
			4y60		2h7g
			4z5h		2han
			5b0z		2hdd
			5b31		2hhs
			5bnh		2hos
			5cbx		2hot
			5cby		2ht0
			5cbz		2i13
			5d4r		2i9g
			5d8k		2ih5
			5e41		2is6
			5e6c		2iso
			5egb		2isp
			5ei9		2itl
			5hlk		2jef
			5ink		2jej
			5j2f		2jg3
			5kl6		2nll
			5szt		2noe
					2np6
					2nq9
					2o4a
					2oaa
					2odi
					2opf
					2pfo
					2pfq
					2pvi
					2py5
					2pyj
					2q10
					2r2t
					2rdj
					2uyc
					2uz4
					2vbl
					2vbn
					2vla
					2vs8
					2vtb
					2w42
					2wbs
					2wiw
					2wq7
					2x6v
					2xc9
					2xqc
					2xrz
					2xsd
					2xzu
					3a4k
					3bm3
					3brg
					3bs1
					3btx
					3c0w
					3c1b
					3c29
					3c2m
					3c2p
					3c5g
					3cbb
					3clz
					3co6
					3coa
					3d0a
					3d0p
					3dw9
					3e3y
					3e6c
					3eeo
					3exj
					3fc3
					3fde
					3fdq
					3fsp
					3fyl
					3g00
					3g0q
					3g6u
					3g8u
					3g97
					3g9i
					3gdx
					3gox
					3gpu
					3gpx
					3gq3
					3gq4
					3gq5
					3gv7
					3h4d
					3h8o
					3h8r
					3h8x
					3hdd
					3hpo
					3hw8
					3i8d
					3igc
					3imb
					3jpp
					3jpq
					3jpr
					3jr5
					3jx7
					3jxb
					3jxc
					3jxd
					3jxy
					3jxz
					3jy1
					3k57
					3kde
					3khr
					3kmd
					3kxt
					3l2c
					3lap
					3ldy
					3lwh
					3lzj
					3m4a
					3m8r
					3m9n
					3mby
					3mq6
					3mqy
					3mr2
					3mr5
					3mva
					3mxm
					3nae
					3ne6
					3ngz
					3o1o
					3o1t
					3o1u
					3o9x
					3ogu
					3oha
					3ojs
					3oqg
					3osn
					3p57
					3pnc
					3po4
					3pvi
					3px0
					3px4
					3px6
					3py8
					3q22
					3q24
					3q8p
					3q8q
					3qep
					3qes
					3qet
					3qi5
					3qnn
					3qno
					3rh4
					3rh5
					3rje
					3rjg
					3rjk
					3rr7
					3rrh
					3s5a
					3s9h
					3sar
					3sas
					3sat
					3sau
					3sav
					3sbj
					3si6
					3sm4
					3snn
					3spd
					3ssd
					3sz2
					3tap
					3u6e
					3u6l
					3u6m
					3u6q
					3u6s
					3uby
					3uiq
					3upq
					3ut9
					3utb
					3v1z
					3v9s
					3v9w
					3v9x
					3va0
					3vk7
					3vxv
					3vxx
					3wpc
					3zp5
					3zvn
					4a75
					4a76
					4aij
					4aik
					4aqx
					4b22
					4b23
					4b5f
					4b5j
					4b9m
					4b9s
					4b9v
					4bdp
					4c8k
					4c8n
					4c8o
					4cis
					4d6o
					4dav
					4df4
					4dkj
					4dl2
					4dl4
					4dlg
					4do9
					4dqi
					4ds4
					4dsk
					4dtn
					4dto
					4dtr
					4dtx
					4e0d
					4e0g
					4e0p
					4ect
					4ecw
					4ecz
					4ed2
					4ed3
					4ed7
					4ed8
					4ejy
					4elt
					4elu
					4f2s
					4f3o
					4f4w
					4f4x
					4f5r
					4f8r
					4fbt
					4ff2
					4fj5
					4fj8
					4fj9
					4fjk
					4fs2
					4g4o
					4g4r
					4glx
					4gxk
					4gz0
					4gz1
					4gz2
					4hc9
					4hsb
					4htu
					4huf
					4hug
					4ibu
					4is1
					4ix7
					4j2a
					4j2d
					4j9k
					4j9n
					4j9q
					4j9s
					4jwm
					4k1g
					4k4g
					4k98
					4kb1
					4khq
					4kld
					4kle
					4klg
					4klj
					4kll
					4klm
					4klo
					4klq
					4kls
					4l5r
					4lox
					4lup
					4lzg
					4m04
					4m3r
					4m3t
					4m3u
					4m3x
					4m3z
					4m42
					4m9l
					4mde
					4mdf
					4mfc
					4n56
					4n5s
					4ncb
					4nid
					4nig
					4nih
					4nii
					4o3q
					4o3r
					4o3s
					4o5k
					4o6a
					4ofe
					4opj
					4opk
					4osh
					4ost
					4osv
					4ot3
					4p4m
					4pcz
					4pd2
					4pdi
					4pgx
					4ppx
					4pw5
					4pw7
					4pzi
					4q45
					4qen
					4qtj
					4qwa
					4qwe
					4qz9
					4qza
					4qzb
					4r2a
					4r2c
					4r2d
					4r2e
					4r2p
					4r2r
					4r63
					4rdu
					4rnm
					4roc
					4rpz
					4rq2
					4rq3
					4rq7
					4rt2
					4rt3
					4rtl
					4rtq
					4rzr
					4s0n
					4tqr
					4tqs
					4uaz
					4ub5
					4ubc
					4uno
					4uqg
					4uqm
					4x5v
					4xa5
					4xqj
					4y60
					4yd1
					4yfu
					4ymm
					4ymo
					4yoy
					4yqw
					4yr0
					4z3a
					4z3c
					4z7b
					5av8
					5av9
					5b0z
					5b31
					5bnh
					5bt2
					5cbx
					5cby
					5cbz
					5chz
					5cl4
					5cl5
					5cl8
					5cl9
					5clb
					5clc
					5cle
					5d49
					5d4r
					5d4s
					5d8l
					5dfi
					5dpk
					5e24
					5e41
					5e6c
					5egb
					5eh2
					5ei9
					5eoz
					5g32
					5g35
					5hdn
					5hf7
					5hlk
					5hnh
					5hrd
					5hrg
					5hri
					5hto
					5iij
					5iio
					5ink
					5inl
					5iwi
					5j0t
					5j0x
					5j2c
					5j2d
					5j2e
					5j2f
					5j2g
					5j2k
					5jh0
					5jk0
					5ke7
					5kfc
					5kfe
					5kff
					5kfh
					5kfi
					5kfk
					5kfl
					5kfm
					5kfo
					5kfp
					5kfq
					5kft
					5kfv
					5kfw
					5kfy
					5kfz
					5kg5
					5kg6
					5kg7
					5kl4
					5kl6
					5kl7
					5kn8
					5kub
					5l1j
					5l2x
					5szt
					5t01
					5t2w
					5tbc
					5tzv
					5u9h
					6mht
